# Supplementary material
Source: Elsevier journal article supplement (https://www.sciencedirect.com/science/article/pii/S0210569122000055)
Supplement: mmc1 [file S0210569122000055:mmc1.pdf]

## MATERIAL ELECTRÓNICO SUPLEMENTARIO

Los criterios de derivación a la consulta postUCI se especifican en la tabla 1 del material electrónico suplementario.

La escala utilizada para evaluar el deterioro físico fue la escala de estado funcional (Functional Status Scale, FSS), definiendo nueva morbilidad un aumento de  $\geq 3$  puntos en la escala. El deterioro cognitivo es difícil de medir en el paciente pediátrico, puesto que las escalas no han sido validadas para niños pequeños. Para detectar el deterioro neurológico se usó la escala PCPC o Pediatric Cerebral Performance Category, definiendo nueva morbilidad como un cambio de categoría.

Así mismo, las escalas se acompañan de la historia clínica y exploración física general y neurológica detallada, con el objetivo de detectar problemas asociados al ingreso.

Para evaluar el aspecto psicosocial se realiza una entrevista por parte de la psicóloga de la unidad, tanto con el paciente como con la familia de manera individual y conjunta.

La escala de calidad de vida utilizada en un primer tiempo fue la escala PedsQL para padres y niños. Sin embargo, a pesar de ser una escala validada y ampliamente utilizada, el planteamiento de las preguntas en negativo inducía error tanto en los pacientes como en las familias. Por este motivo se modificó al cuestionario de calidad de vida relacionado con la salud KINDL, más sencillo de utilizar. Este cuestionario incluye 6 dimensiones básicas, como son bienestar físico, bienestar emocional, autoestima, familia, amigos y escuela. Existen tres versiones diferentes en función de la edad (de 4-7 años, de 8-12 y de 13 a 16 años) y dos versiones para padres (de 4 a 7 y de 8-16 años). Una mayor puntuación en la escala se corresponde con una mejor calidad de vida relacionada con la salud. En este caso, las preguntas relacionadas con el bienestar físico se utilizaron para valorar morbilidad a este nivel, las preguntas sobre bienestar emocional, autoestima, familia y amigos ayudaron a valorar el estado mental y las preguntas sobre la escuela orientaron acerca de problemas mentales y cognitivos.

Por último, se utilizó la escala Zarit reducida para evaluar la sobrecarga familiar (por el tiempo utilizado en consulta y el número de escalas a rellenar), estableciendo como punto de corte una puntuación superior o igual a 17 para determinar la existencia de sobrecarga.

**Tabla 1. Criterios de asistencia a consulta postUCI**

- |                                                                                                                                                                                                                                                                                                                                                                                                                                                                                                                                                                                                                                      |
|--------------------------------------------------------------------------------------------------------------------------------------------------------------------------------------------------------------------------------------------------------------------------------------------------------------------------------------------------------------------------------------------------------------------------------------------------------------------------------------------------------------------------------------------------------------------------------------------------------------------------------------|
| <ul style="list-style-type: none"><li>- Urgencia vital</li><li>- Necesidad de técnicas de sustitución de órganos o funciones (ventilación mecánica invasiva, drogas vasoactivas, técnicas de depuración extrarrenal, etc.)</li><li>- Ingreso prolongado (&gt;7 días).</li><li>- Infección por coronavirus SARS-CoV-2.</li><li>- Necesidad al alta de un dispositivo iniciado en UCIP (portador de traqueostomía con o sin ventilación mecánica invasiva, ventilación mecánica no invasiva...).</li><li>- Presencia de “signos de alerta” de desarrollo de síndrome postUCI en el paciente o su familia durante su ingreso.</li></ul> |
|--------------------------------------------------------------------------------------------------------------------------------------------------------------------------------------------------------------------------------------------------------------------------------------------------------------------------------------------------------------------------------------------------------------------------------------------------------------------------------------------------------------------------------------------------------------------------------------------------------------------------------------|
